# Supplementary material for: Could Chronic Rhinosinusitis Increase the Risk of Ulcerative Colitis? A Nationwide Cohort Study
Source: MDPI journal article supplement (doi:10.3390/diagnostics12102344), 2022-09-28
Supplement: s1 [file s1]

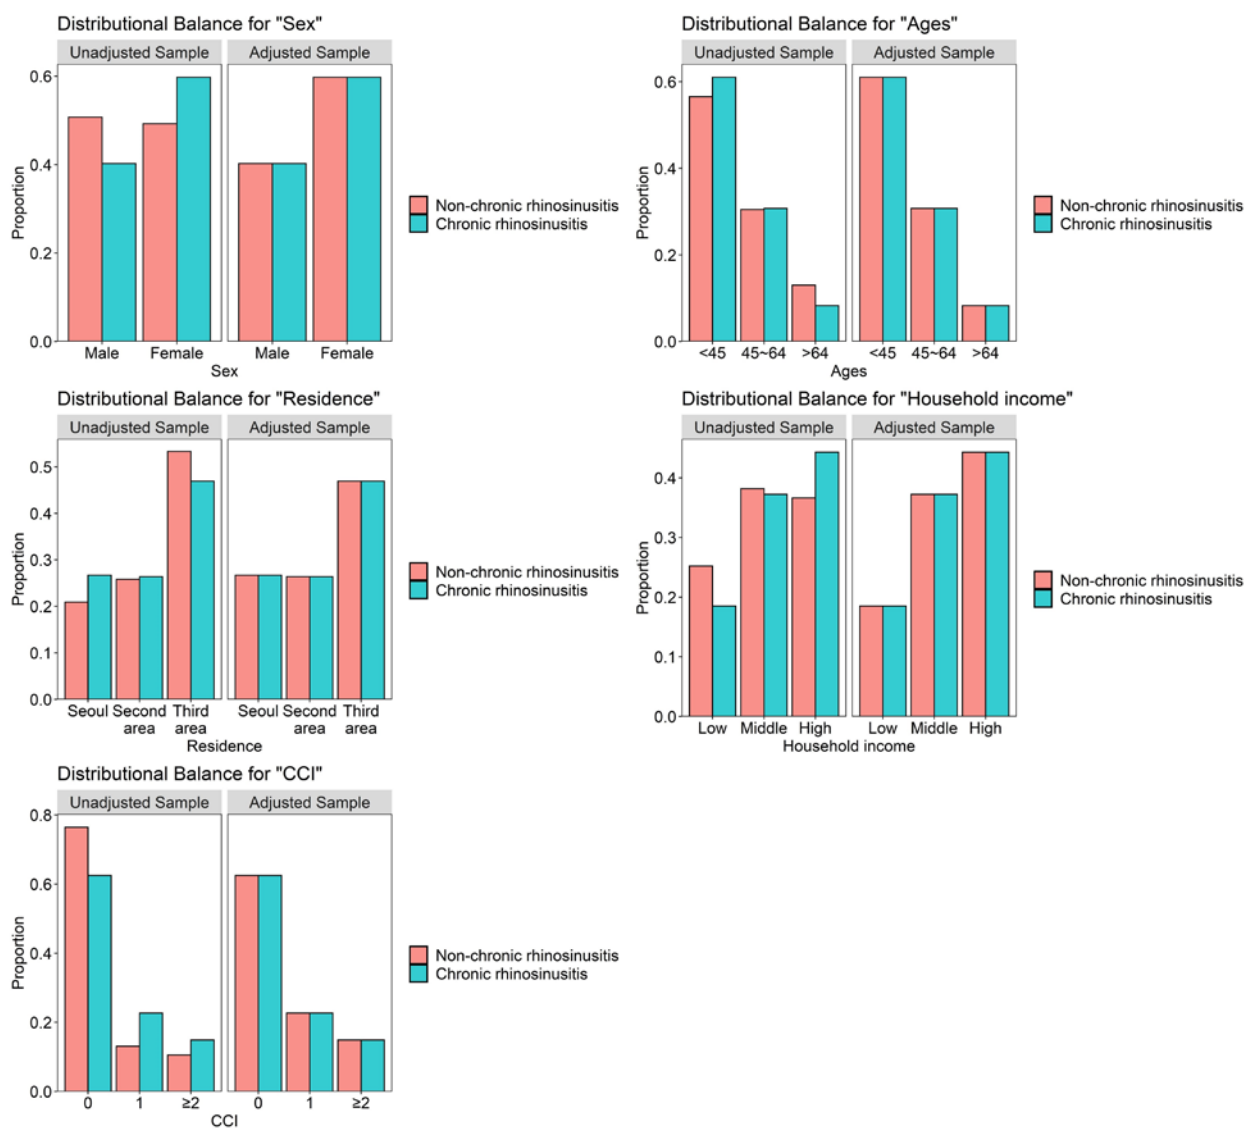

**Figure S1.** Confirmation of appropriate matching between the comparison and chronic rhinosinusitis groups using the balance plot for five variables before and after matching.
